# Implicit adaptation processes appear unable to account for learning in sensorimotor adaptation tasks.

Sarah A. Wilterson and Jordan A. Taylor

Department of Psychology  
Princeton Neuroscience Institute  
Princeton University

The authors declare no competing interests, financial or otherwise.

This work was supported by the National Institute of Neurological Disorders and Stroke (Grant R01 NS-084948 to J. A. Taylor). We thank Peter Butcher for providing extensive coding assistance in preparing the main experimental task.

Contact:  
Sarah Wilterson  
[shutter@princeton.edu](mailto:shutter@princeton.edu)

## **Abstract**

Learning in sensorimotor adaptation tasks has been historically viewed as solely an implicit learning phenomenon. However, recent findings suggest that implicit adaptation is heavily constrained, calling into question its utility in motor learning, and the theoretical framework of sensorimotor adaptation paradigms. These inferences have been based on results from single bouts of training, thus, it is possible that implicit adaptation processes supersede explicit re-aiming strategies over repeated practice sessions. We tested this by dissociating the contributions of explicit re-aiming strategies and implicit adaptation over five consecutive days of training. Implicit adaptation plateaued at a value far short of complete learning. We sought to determine if these constraints on implicit adaptation extend to another sensorimotor task, mirror reversal. Implicit adaptation was inappropriate for mirror reversal and became suppressed during training. We suggest that the implicit adaptation process studied in sensorimotor adaptation paradigms cannot support long-term motor skill learning.

## Introduction

A fundamental function of the motor system is the adjustment of previously learned skills to accommodate changes in the environment or body. Many people might be familiar with such an accommodation from experience adjusting to new prescription eyeglasses. In the late 19<sup>th</sup> century, George Stratton (1896, 1897) noted that even radically altered visual input could be overcome by the motor system to allow for normal interaction with everyday objects. These experiments were conducted with prism goggles, which flipped the visual world upside down and transposed it left to right. Stratton (1896, 1897) and Kohler (1941, 1951a, 1951b; review in Sachse et al., 2017), documented their adjustment to the world of prism goggles, including an early stage of physical mishaps (e.g. knocking over drinks) and visual oddities (e.g. stepping over a street sign that appears to be on the walkway), which eventually gave way to complete adaptation to the visual perturbation. Kohler (1951b) reported that after five days of continuous prism goggle use, the visual world suddenly became upright once more. Eventual removal of the prism goggles after complete compensation resulted in a strong aftereffect: a world that once again seemed upside-down. The presence of this slow adaptation followed by an aftereffect, coupled with the seminal findings of mirror reversal learning in patient H.M. (Corkin, 1968), led researchers to assume that the motor system's compensation to visual perturbations is the result of an implicit memory system. Indeed, it is unlikely that the subjects in Kohler's experiments were leveraging cognitive strategies to flip the world right-way-up throughout the entire time course of learning.

Building on these anecdotal observations, the field of motor learning has focused on carefully characterizing this presumably implicit process through sensorimotor adaptation paradigms. A common approach is to ask participants to make point-to-point reaching movements to nearby targets while the hand is obscured from view and visual (or proprioceptive) feedback is artificially perturbed (Held and Schlank, 1959; Cunningham, 1989; Imamizu et al., 1995; Pine and Krakauer, 1996; Krakauer, 2009). These experiments have revealed that learning follows an approximate power law function as the subjects adapt to the perturbed feedback. Importantly, aftereffects as first described by Helmholtz (1867), are observed when the perturbation is removed, which echo the anecdotal observations from Stratton and Kohler.

Much has been learned about motor learning using sensorimotor adaptation methods, such as learning rates (Scheidt, Dingwell, and Mussa-Ivaldi, 2001; Baddeley, Ingram, and Miall, 2003), response sensitivity functions (Fine and Thoroughman 2006, 2007; Wei and Körding, 2009), and

consolidation (Brashers-Krug, Shadmehr, and Bizzi, 1996; Shadmehr and Brashers-Krug, 1997), just to name a few. Importantly, these findings have been largely interpreted under the view that learning was entirely implicit. Indeed, the small, trial-by-trial adaptation effects are often assumed to underlie the mechanisms of long-term motor learning (Jordan and Rumelhart, 1992).

A number of studies have challenged the view that learning is an entirely implicit process. Initially, these studies showed that participants could use their knowledge of a perturbation to overcome it in the absence of developed implicit adaptation (Redding and Wallace, 1996; Hegele and Heuer, 2008, 2010). Participants who were provided an explicit strategy achieved immediate and complete, if not entirely accurate, compensation for the imposed perturbation (Mazzoni and Krakauer, 2006; Benson et al., 2011). This shows that the slow, gradual process of implicit adaptation is not necessary to compensate for visuomotor rotations. More recent work has assayed the operation of explicit strategies and implicit adaptation during training and found that explicit strategies continue to operate even after an hour of training (Taylor, Krakauer, and Ivry, 2014). Even more challenging for a unitary implicit motor learning account: implicit adaptation appears to be highly stereotyped regardless of the particular task demands, such as the size of the visual perturbation (Bond and Taylor 2015). This finding is further supported by studies examining the adaptive response under task-irrelevant-clamped-error feedback, which revealed stereotyped asymptotic adaptation when the incentive to strategize is completely removed (Morehead, Taylor, Parvin, and Ivry, 2017; Kim, Morehead, et al. 2018). This result holds true even after many hours of practice in the perturbed environment (Morehead and Smith, 2017). Given these results, it is difficult to see how implicit adaptation could produce long-term motor learning in the absence of explicit re-aiming.

A limitation to many of these visuomotor rotation experiments is that they are conducted over a single block of massed learning, with the full experiment taking place on a single day. Experiments have shown that a rest period, following exposure to a perturbed training environment, allows for continued learning in the absence of the stimuli (Brashers-Krug, Shadmehr, and Bizzi, 1996). Over time, fragile motor memories transform to consolidated memories that are protected from disruption and more difficult to unlearn (Krakauer and Shadmehr, 2006; Criscimagna-Hemminger and Shadmehr, 2008). Consolidation of motor memories is suggested to require several hours or even days between learning and trial exposures (Krakauer and Shadmehr, 2006). It is possible that implicit learning requires consolidation periods

in order to reach a sufficient magnitude to fully compensate for a large visuomotor rotation. However, we cannot evaluate this claim from previous studies of consolidation as these experiments did not distinguish between explicit re-aiming and implicit adaptation.

In Experiment One, we characterize the relative contribution of explicit re-aiming and implicit adaptation in a long-term visuomotor rotation training paradigm, one that took place over five separate days of training. Our goal was to determine if sufficient practice would result in explicit strategies giving way to full implicit adaptation.

An additional complication to long-term motor learning, not considered in Experiment One, is the directional nature of implicit adaptation. Several studies have revealed that the key factor to implicit adaptation appears to be the direction of the perturbation, as opposed to the size of the perturbation (Fine and Thoroughman 2006, 2007; Wei and Kording, 2009; Semrau, Daitch, and Thoroughman, 2012; Morehead et al 2017; Butcher and Taylor, 2018). The implicit response to directional information appears to be automatic: the motor system automatically adapts in a direction opposite to the perturbation even when such adaptation is task-irrelevant (Schaefer, Shelly, and Thoroughman, 2012, Morehead et al 2017; Butcher and Taylor, 2018). This automatic response to directional information has led researchers to question the role that implicit adaptation might play in visuomotor mirror reversal tasks (Telgen, Parvin, and Diedrichsen, 2014). Indeed, Telgen and colleagues (2014) found that the error-corrective feedback response under mirror reversal was directed the wrong way even after a few days of training (Figure 1).

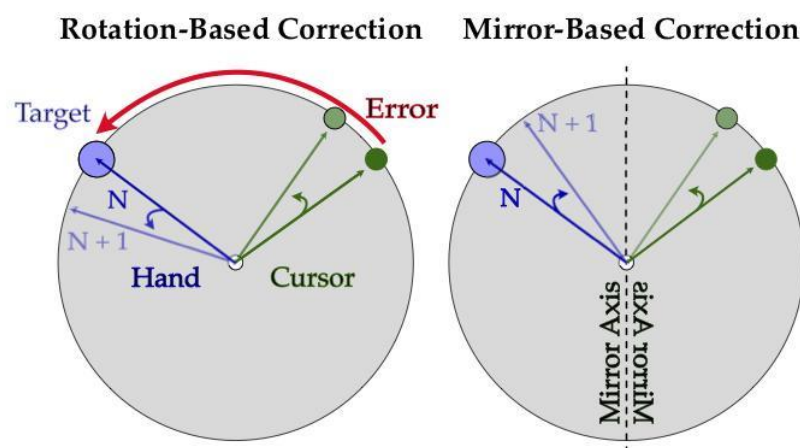

Figure 1. Appropriate correction by implicit adaptation for both rotation and mirror reversal perturbations.

Furthermore, they found that consolidation and changes in a speed-accuracy tradeoff differ considerably between rotations and mirror reversals. It is worth noting, that a mirror reversal is exactly the task that HM was able to complete, which raises the question as to how this was accomplished if implicit adaptation – as we know it from previous visuomotor rotation studies – appears unable to solve a mirror reversal.

In Experiment Two, we sought to determine if implicit adaptation could become useful in a mirror task given a sufficient training period. Of particular interest was the eventual comprisal of a repeatably practiced, and mastered, compensation to a mirror reversal perturbation as either explicit re-aiming, implicit adaptation, or a combination thereof.

## Results

### *Experiment One*

In Experiment One, twelve subjects participated in a visuomotor rotation task for one hour each day for five consecutive days. Subjects attempted to compensate for a visual perturbation of  $45^\circ$  while reaching to targets that appeared on a circle centered by the start-position. To dissociate explicit and implicit learning, subjects reported their intended end position (re-aiming) using a touch-screen monitor (Bond and Taylor, 2017; Hutter and Taylor, 2018).

As expected, participants were able to compensate for the visual perturbation during the first day of training (Figure 2). Nearly perfect performance was achieved by the end of the first day ( $44.8 \pm 2.0^\circ$ ) and was maintained in the fifth day of training ( $44.7 \pm 0.8^\circ$ ). Interestingly, this high level of performance was supported by a relative mixing of explicit re-aiming and implicit adaptation both on the first day ( $28.1 \pm 6.7^\circ$  re-aiming vs.  $16.7 \pm 6.4^\circ$  adaptation) and on day five of the experiment ( $30.7 \pm 16.2^\circ$  re-aiming vs.  $13.9 \pm 16.3^\circ$  adaptation). Note, while it appears that explicit re-aiming accounts for nearly twice as much learning as implicit adaptation, performing inferential statistics between explicit and implicit learning is theoretically inappropriate since our implicit measure is derived from our explicit measure.

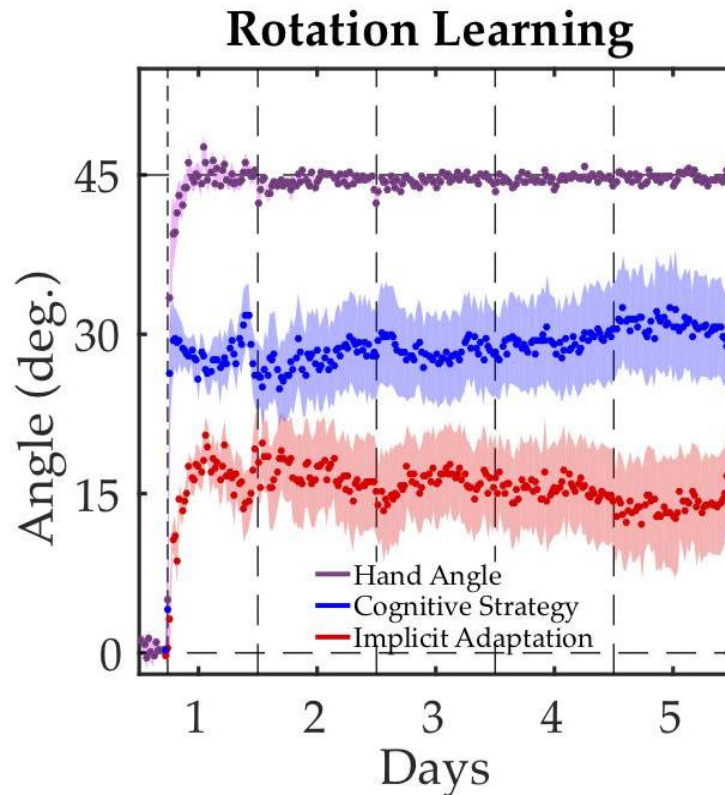

Figure 2. Time course of responses over five days of training to a 45° rotation, for hand angle (purple), cognitive strategy/explicit re-aiming (blue), and implicit adaptation (red). The horizontal dashed lines represent first the onset of the rotational perturbation, then day breaks. Shaded areas represent standard error.

*Analysis of within- and between-subject variance:* While learning appears to be divided between explicit and implicit processes, visual inspection shows a notable increase in the between-subject variance for explicit re-aiming and implicit adaptation following the first day of training. This suggests that the relative contribution of explicit and implicit adaptation may differ dramatically between subjects. Indeed, if we examine the median subject and the two extremes of the distribution, we find a full continuum of learning patterns (Figure 3A). Our twelve subjects run the gamut from complete implicit adaptation (Figure 3B), through a mixture of implicit adaptation and explicit re-aiming (Figure 3C), to full explicit re-aiming (Figure 3D).



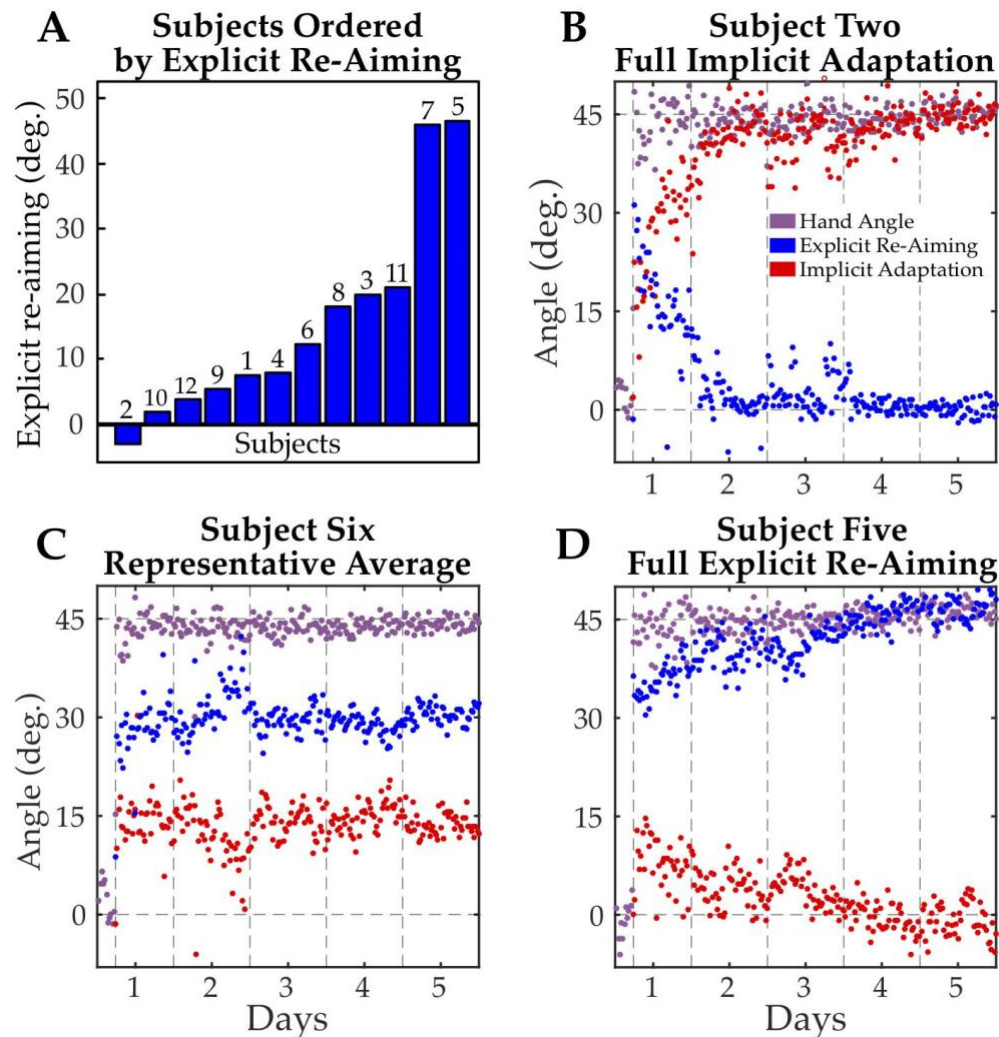

Figure 3. (A) A bar graph ordering subjects by the average amount of explicit re-aiming that they reported during the last 100 trials of day five. (B) The subject (#2) reporting the least explicit re-aiming at the end of learning, assumed to have the most implicit adaptation. (C) A subject (#6) representative of the average taken from the middle of the distribution. (D) The subject (#5) reporting the most explicit re-aiming (i.e. aiming at the solution with no perceptible implicit adaptation at the end of day five).

Despite these individual differences, participants appeared to be remarkably consistent in maintaining their personal relative contribution of explicit and implicit learning across days. To quantify this, we performed a regression comparing explicit re-aiming and implicit adaptation at the end of each day to the same measure at the beginning of the following day (Figure 4). We found a high correlation between the end of one day and the beginning of the next for both explicit re-aiming (*Pearson's*  $r = 0.94$ ,  $p < 0.0001$ ) and implicit adaptation (*Pearson's*  $r = 0.94$ ,  $p <$



0.0001). To underscore that this correlation only reflects consistency at the individual level and not at the group level, we sought to quantify group consistency by shuffling the individual data. Here, we randomly assigned the prior days of each subject to the following days of a different subject 10,000 times. Averaging the correlation over these runs results in a correlation coefficient a fraction of the size seen for the true data (explicit re-aiming *average*  $r = -0.07$ ,  $p < 0.05$  on 28% of runs; implicit adaptation *average*  $r = -0.07$ ,  $p < 0.05$  on 27% of runs).

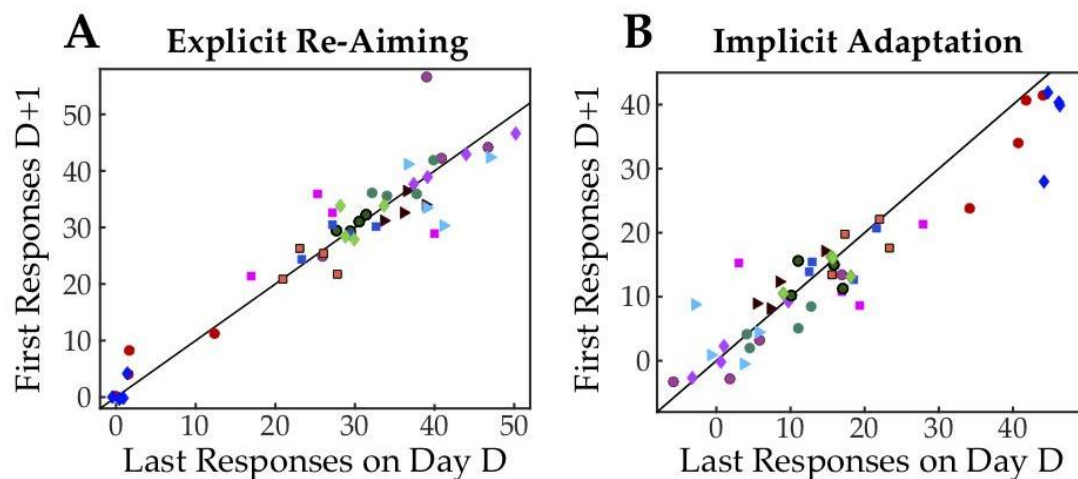

Figure 4. Average explicit re-aiming (A) and implicit adaptation (B) in last bin (16 trials) of day D plotted against first bin of day D+1 ( $r = 0.94$ ,  $p < 0.0001$ ). Each subject contributed 4 data points, and is represented by shape and color for visual clarity. The diagonal lines represent the unity line between responses on D and D+1.

*Analysis of adaptation measurements:* When we use trial-by-trial aiming data to infer implicit adaptation levels, two subjects appear to compensate fully with implicit adaptation and five subjects appear to be using a completely explicit strategy. We compared this result with the traditional aftereffects measure, which was completed at the end of the 5<sup>th</sup> day of training, during washout trials where subjects were instructed to aim directly at the target without using any strategy and on which no feedback was given. However, by the end of day five, not a single subject shows a full 45° aftereffect, or a 0° aftereffect – indicative of learning entirely via implicit adaptation and explicit re-aiming strategies respectively (Figure 5A). Indeed, this disconnect was confirmed by examining the correlation between the final bout of explicit re-aiming data on the fifth day of training with the aftereffects measures ( $r = 0.26$ ,  $p > .05$ ). It is immediately apparent

that the aftereffects measure does not display the same range of adaptation that we saw using the aim subtraction method. By the washout measure, all subjects compensated for the perturbation using a mixture of implicit adaptation and explicit re-aiming (average aftereffect =  $18.5 \pm 4.0^\circ$ ). However, it is important to note that we observed a steep decay in implicit adaptation over the course of the washout block (Figure 5B). This suggests that only the initial few trials, which themselves are inherently noisy, are an accurate representation of each individual subject's implicit adaptation.

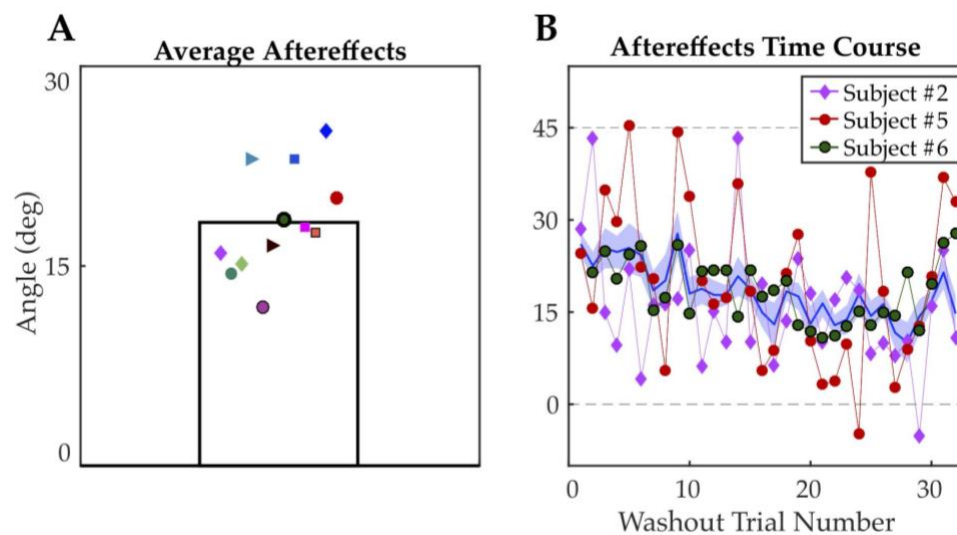

Figure 5. (A) Average aftereffect for each subject across the 32 trials of no-feedback, washout. Each subject is labeled congruent with Figure 4 and jittered left to right in order of least to most explicit re-aiming at the end of Day 5 (see Figure 3A). (B) The time course of washout for the average across subjects and individual trial values for the three representative subjects defined in Figure 3. The individual subject markers are congruent with Figures 4 and 5A. Shaded area represents the standard error of the mean for all subjects.

More confidence is warranted in suggesting that some participants fully strategized their way out of the rotation problem. This is because they had to be aware of the correct solution in order to tell us that they intended to move  $45^\circ$  away from the target. Every subject showed non-zero aiming at the beginning of training, indicating that they understood the instructions. Contrast this with the fully implicit subject, who is telling us that they don't perceive a rotation and so taps on or very near the target each trial. Such behavior could also be explained by a misinterpretation of the instructions or laziness. Note, however, participants were required to report their intended

aiming strategy on each trial, limiting the effort saved by reporting inaccurately. Importantly, in post-participation debriefing one of these subjects indicated that they thought the perturbation was removed; the second such participant declined to be interviewed.

We conducted several post-hoc analyses in an attempt to determine the cause of the variability in implicit adaptation found in this experiment. Regression analyses with day-five implicit adaptation regressed by inter-trial interval, reaction time, movement time, or reach end-point variability, all produced null results ( $p > .26$ ). It is likely, however, that this is the result of limited power driven by a small sample size for this type of analysis. A study specifically designed – with much greater power – will be required to identify the source of individual variability.

*Experiment One Conclusion:* The average response to long-term adaptation in a visuomotor rotation tasks suggest that both implicit adaptation and explicit re-aiming continue to play a role in performance even after several days of training. However, we found implicit adaptation to be fairly constrained, which is surprisingly consistent with the findings from studies examining the capacity of single-session implicit learning. We saw only limited evidence in only two subjects that implicit adaptation could eventually replace explicit re-aiming. In Experiment Two, we sought to determine if implicit adaptation could appropriately compensate for a task with a different error structure, a mirror reversal.

### *Experiment Two*

In Experiment Two, twelve subjects participated in a visuomotor mirror reversal task for five consecutive days. Subjects compensated for a mirror perturbation originating at the midline while reaching to targets that appeared on a circle around the start position. Targets were positioned such that the correct response resulted in a 45° angle between hand and feedback. Subjects reported intended re-aiming using a touch-screen monitor before each trial. The procedure was exactly the same as previously used in Experiment One.

As shown in Figure 1, useful implicit adaptation in rotation paradigms has been described as that responding to the discrepancy between the cursor feedback and aiming location (Taylor and Ivry, 2011; Day, Roemmich, Taylor, and Bastian, 2016). For implicit adaptation to be useful in the mirror reversal task, the implicit error signal must be calculated in the opposite direction as it is for rotational perturbations. Additionally, the mirror reversal imposes a counterclockwise error in quadrants one and three but a clockwise error in quadrants two and four (Figure 6) - similar to

a dual adaptation paradigm (Howard et al., 2012; Schween et al., 2019). This complicates the transformation space over targets generally used to view average behavior. Given the opposing errors, we combined responses for the targets in quadrants 1 and 3 (i.e., at  $22.5^\circ$  with those at  $247.5^\circ$ ; Figure 7) and responses for the targets in quadrants 2 and 4 (i.e., at  $112.5^\circ$  with those at  $292.5^\circ$ ; Figure 8) for clarity of visualization on graphics. Statistical analyses were conducted on the full data set, combining all target locations by flipping the sign of quadrants two and four prior to averaging.

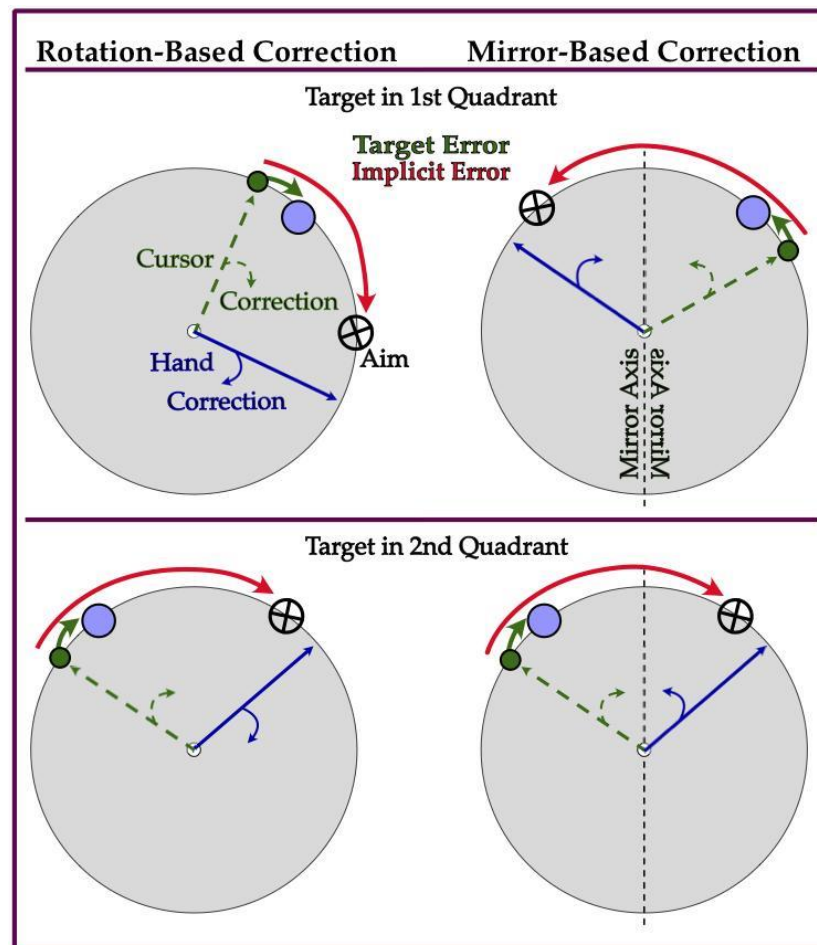

Figure 6. Diagram of appropriate corrections for both rotation and mirror-reversal perturbations given targets in the first and second quadrants. The error sign changes under a mirror perturbation.

Unlike the visuomotor rotation in Experiment One, participants on average slightly over-compensated for the mirror reversal perturbation on the first day ( $48.5 \pm 3.8^\circ$ ), however, performance on the final day was nearly perfect ( $45.7 \pm 1.3^\circ$ , Figures 7A and 8A). On the first day,

performance was again a mixture of implicit adaptation ( $8.0 \pm 4.6^\circ$ ) and explicit re-aiming ( $40.5 \pm 5.4^\circ$ ). However, while implicit adaptation initially contributed to learning (t-test of first day,  $t = 6.050$ ,  $p < .001$ ), it gradually decreased over time (paired t-test between adaptation on first and last day,  $t = 2.202$ ,  $p = .049$ ) and was not significantly different from zero on the final day ( $2.2 \pm 7.8^\circ$ ,  $t = 0.961$ ,  $p = .357$ ). On average, participants fully compensated for the mirror reversal with explicit re-aiming ( $43.6 \pm 7.6^\circ$ ) on the final day of training.

*Analysis of adaptation measurements:* To determine if the mirror reversal task resulted in mirror-appropriate adaptation, or if the error was processed as if it was a shifting rotation, we simulated the potential results using a modified two-state-space model (Smith et al., 2006). Within the model, we assumed that the explicit re-aiming is updated based on target error, while implicit adaptation is updated based on the aim-to-cursor distance (Taylor and Ivry 2011; McDougle, Bond, and Taylor, 2016; See methods for details). The learning forgetting rates were determined by tuning these parameters to the simple rotation case to cap implicit adaptation at approximately  $15^\circ$  (Rotation-Task-Rotation-Correction Model, Figures 7B and 8B; Morehead and Smith, 2017). These same parameter values were then used for both of the Mirror-Models. In the Mirror-Task-Rotation-Correction Model, the error for implicit adaptation was defined in exactly the same way as in the Rotation-Task-Rotation-Correction Model (Figure 7C and 8C). However, to demonstrate the effect of implicit adaptation switching the error-correction calculation to be consistent with the mirror reversal, we flipped the sign of the implicit error term in the Mirror-Task-Mirror-Correction Model (Figure 7D and 8D).

When the mirror task is simulated with error calculated as appropriate for a rotation [ $aim - target$ ], the result is a response pattern much like that of the data. In contrast, an error calculation that is appropriate for the mirror [ $-(aim - target)$ ], produces results in a radically different pattern from the data (compare Figure 7.A to 7.C-D and Figure 8.A to 8.C-D). The modeling results demonstrate that implicit adaptation under a mirror reversal first operates as if the perturbation was rotational in nature, then suppresses this adaptation.

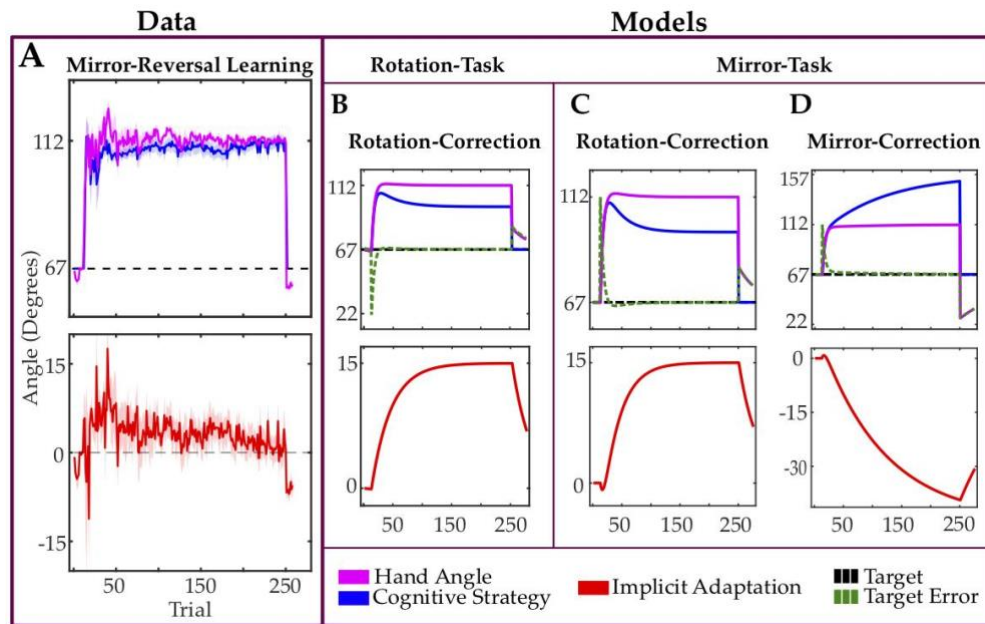

Figure 7. (A) Mirror reversal learning for all 12 subjects to targets in the first and third quadrants. (B) Rotation-Task-Rotation-Correction Model for target at  $67.5^\circ$  with parameters tuned to limit implicit adaptation to about  $15^\circ$ . (C) Mirror-Task-Rotation-Correction Model with parameters defined as in 'B'. (D) Mirror-Task-Mirror-Correction Model with parameters defined as in previous. Implicit error term is reversed from the rotation correction.

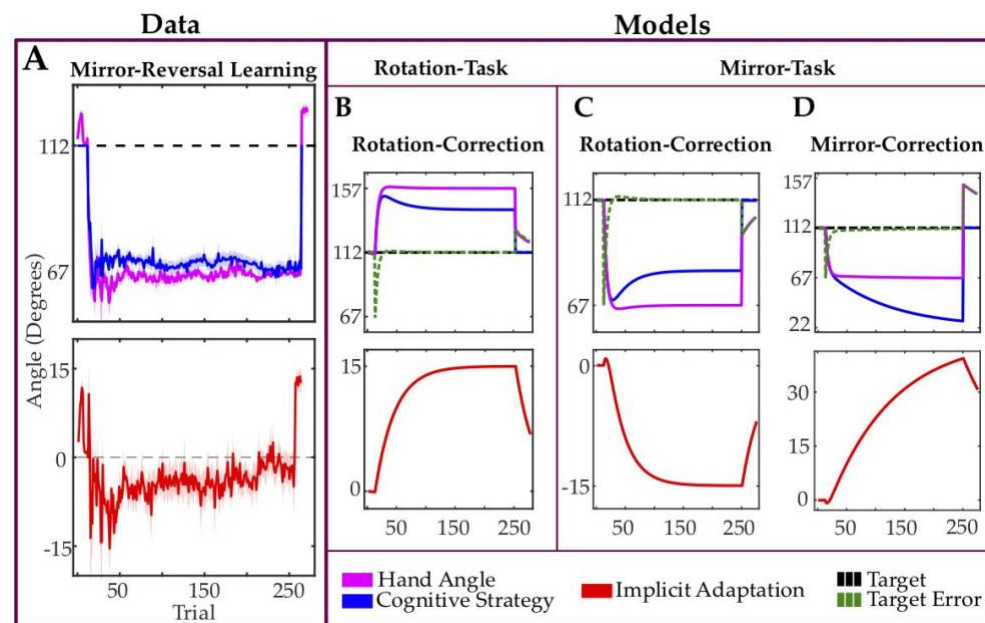

Figure 8. (A) Mirror reversal learning for all 12 subjects to targets in the second and fourth quadrants. (B) Rotation-Task-Rotation-Correction Model for target at  $112.5^\circ$  with parameters tuned to limit implicit adaptation to about  $15^\circ$ . (C) Mirror-Task-Rotation-Correction Model with parameters defined as in 'B'. (D) Mirror-Task-Mirror-Correction Model with parameters defined as in previous. Implicit error term is reversed from the rotation correction.



In the washout phase, at the end of day five, subjects were instructed to aim directly at the target without using any strategy to measure the size of the aftereffect. Similar to Experiment 1, we observed a very limited range of aftereffects compared with implicit adaptation calculated throughout training. After correcting for baseline bias, aftereffects hover slightly, yet significantly, below zero (average corrected aftereffect =  $-3.06 \pm 3.2^\circ$ ,  $t$ -value = -3.32,  $p = .007$ , Figure 9). As in Experiment One, subjects were instructed to aim directly at the target without using any strategy in washout trials and no feedback was given. In addition to exhibiting high variance, the washout phase was confounded by the discrepancy between aiming to hit a target in training versus aiming to hit that same target in washout. Adaptation appears to be centered around the aim location, not the target location (Day et al 2016; McDougale and Taylor, 2019; Schween et al 2019). In our task, a correct re-aiming location in training is approximately the same location as another target on the opposite side of the mirror axis. The new aiming location in washout (i.e. directly at the target) is at the same location as that for the opposite target in training. Adaptation that resulted in positive aftereffects (relative to the adaptation expected in a visuomotor rotation task) during training would have resulted in negative aftereffects in washout. This suggests that we should read the average aftereffect (shown in Figure 9A) as being in the appropriate direction to correct for a rotational error.

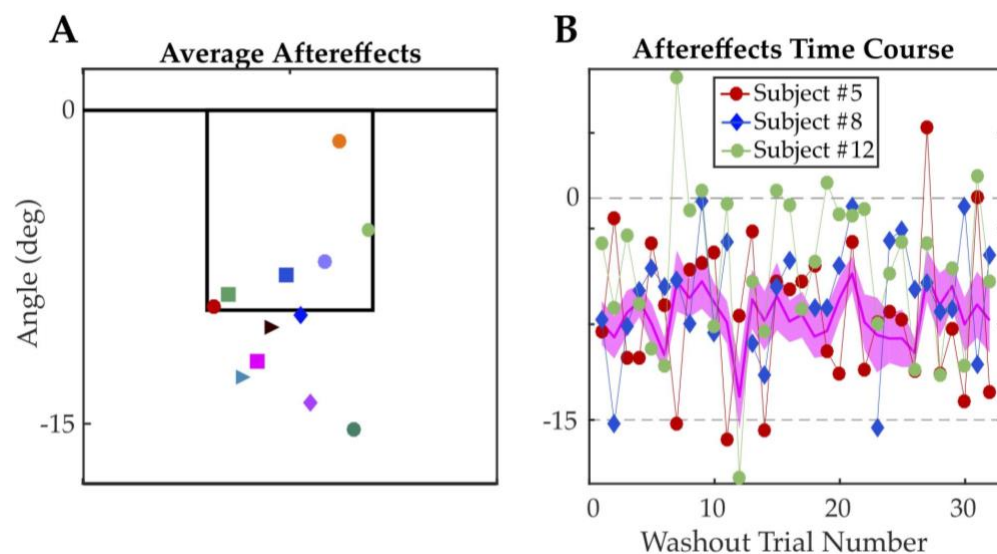

Figure 9. (A) Average uncorrected aftereffects for each subject across the 32 trials of no-feedback, washout. Each subject is jittered left to right in order of least to most explicit re-aiming at the end of Day 5. (B) The time course of washout for the average across subjects and individual trial values for three representative



subjects [#5 (Lowest), #8 (Median), #12 (Highest), re-aiming on last day). The shaded area represents the standard error of the mean for all subjects.

*Analysis of within- and between-subject variance:* Not all subjects responded in the same way to the visuomotor mirror reversal. Subjects were successful through a combination of implicit adaptation and explicit re-aiming, or lost all implicit adaptation by the end of training. Although reversing the direction of implicit adaptation is the only way for that implicit adaptation process to be useful when compensating for a mirror reversal, however, we saw very little evidence for such a reversal across individuals (particularly once corrected for baseline bias).

As in Experiment One, we conducted a linear regression analysis to determine how consistent subjects were across days (Figure 10). We again found remarkable consistency within each subject; expressed as a high correlation between the end of one day and the beginning of the next for both explicit re-aiming (*Pearson's*  $r = 0.865$ ,  $p < .0001$ ) and implicit adaptation (*Pearson's*  $r = 0.770$ ,  $p < .0001$ ). When this result was contrasted with a randomization between days D and D+1, the result is a far worse average correlation than the true data for both explicit re-aiming (*average*  $r = -0.067$ ,  $p < 0.05$  on 23% of runs) and implicit adaptation (*average*  $r = -0.071$ ,  $p < 0.05$  on 11% of runs).

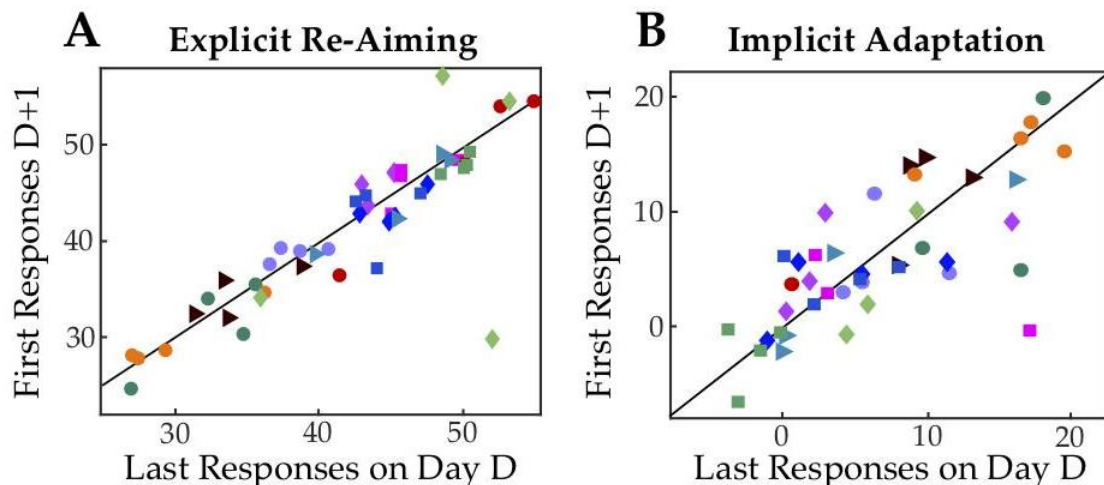

Figure 10. Average explicit re-aiming (A) and implicit adaptation (B) in last bin (16 trials) of day D plotted against first bin of day D+1 ( $r = 0.77$  and  $r = 0.87$ , respectively; all  $p < 0.0001$ ). Each subject contributed 4 data points, and is represented by shape and color for visual clarity. The diagonal lines represent the unity line between responses on D and D+1.

### *Comparison of the Results of Experiments One and Two*

Although Experiments One and Two were designed sequentially, and therefore should not be statistically compared, we took care to keep both experiments as similar as possible to allow qualitative comparison. To this end, the mirror targets were chosen to provide the same solution angle as a 45° rotation.

We saw a steadily declining average implicit adaptation function for subjects training to a mirror reversal in Experiment Two. This is in contrast to the flat average implicit adaptation function seen for the duration of training to a 45° visuomotor rotation. A visual comparison of these time courses shows starkly different behavior between the two groups (Figure 11). While subjects completing the mirror reversal task did not, on average, reverse their implicit adaptation sufficiently for it to work with their learning goal, they did suppress adaptation when compared to the subjects learning a rotation. This suppression is evident from the first day of training, where we see a slowing of initial adaptation rate. The source of this suppression, as observed by Telgen and colleagues (2014), remains an open question (see discussion).

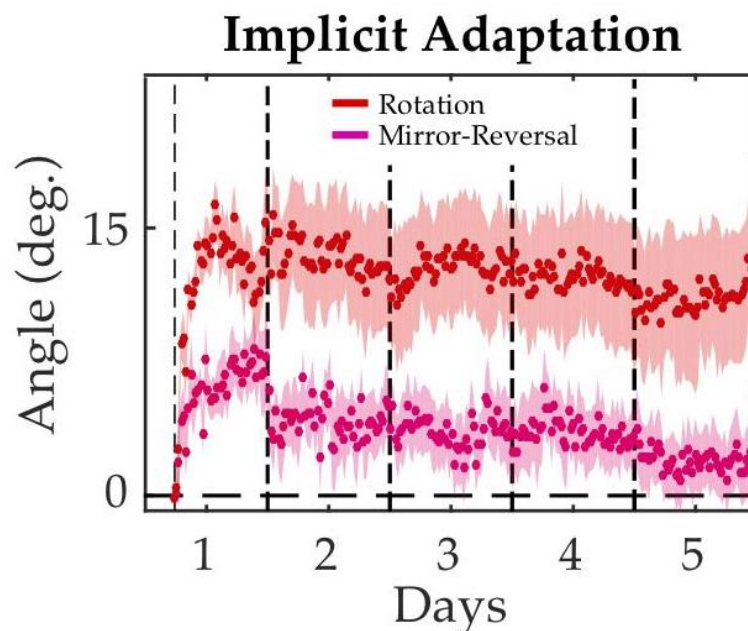

Figure 11. Time course of calculated implicit adaptation over five days of training to a 45° rotation and mirror reversal. The horizontal dashed lines represent first the onset of the rotational perturbation, then day breaks. Shaded areas represent standard error of the mean.

## Discussion

Adaptation of the motor system in response to altered feedback as a purely implicit process can be dated as far back as Stratton (1896). Our everyday experiences reflect this view. For example, compensating for the lateral and vertical shift of a computer mouse or a new pair of eyeglasses does not feel like an explicit process. In experimental manipulations, implicit adaptation has been measured either by subtraction from explicitly indicated re-aiming or as an aftereffect, the latter of which has been interpreted as evidence for implicit learning underlying skill learning (Hollerbach and Atkeson, 1987; Jordan and Rumelhart, 1992). Regardless of the metric used to measure implicit adaptation, across two experiments we found that implicit adaptation does not fully account for a highly practiced adaptation.

This result may have been expected given recent evidence that implicit adaptation falls well short of full learning (Morehead and Smith, 2017; Morehead, Taylor, Parvin, and Ivry, 2017; Kim et al., 2018; Kim, Parvin, and Ivry, 2019). We hypothesized that this failure of implicit adaptation was due to a lack of sufficient opportunity for consolidation, an idea that failed to be supported by our five-day experiments. The failure of what we have been measuring as implicit adaptation in the sensorimotor learning field is underscored by the mirror reversal task. Even after five days, implicit adaptation was suppressed or remained counter to the subject's goal. This supports previous studies which found counter-productive adaptation in mirror reversal tasks (Telgen, Parvin, and Diedrichsen, 2014). The inflexibility of implicit adaptation, even after multiple days of training, restricts its usefulness for many motor learning tasks. Humans exhibit great flexibility and adaptability under numerous motor learning conditions, as often illustrated by elite athletes, and implicit adaptation appears insufficient to account for such performances.

Interestingly, implicit adaptation was suppressed over time in the mirror reversal task. One possible explanation is the presence of an error-signal that has a constantly switching sign. Previous work has shown that inconsistency in error signals reduces overall learning (Castro et al., 2014) and implicit adaptation in particular (Hutter and Taylor, 2018), which is consistent with the motor system storing a history of errors (Herzfeld et al., 2014). However, we acknowledge that this is speculative and future experiments will be necessary to pin down what features of the task may be responsible for modulating implicit adaptation processes.

Although implicit adaptation is insufficient for learning, we submit that it is highly unlikely that subjects are performing a time-intensive, computationally-demanding, strategizing process at

the end of five days of training. A more likely explanation is that the re-aiming strategy has become partially proceduralized, which may be reflected in participants' reaction or preparation times (Logan, 1980; Cohen, Dunbar, and McClelland, 1990). Reaction time increases are commonly observed at the onset of visuomotor perturbations and gently decline with training (Saijo and Gomi, 2010; Fernandez-Ruiz, Wong, et al., 2011; McDougale and Taylor, 2019). If preparation time is limited, performance is significantly hindered in visuomotor rotation tasks as participants may not have sufficient time to re-aim their movements to counter the rotation (Fernandez-Ruiz et al., 2011; Haith et al., 2015). One study found that performance under constrained preparation time can only be restored following two days of training, potentially reflecting a proceduralization of the re-aiming strategy (Huberdeau, Krakauer, and Haith 2017).

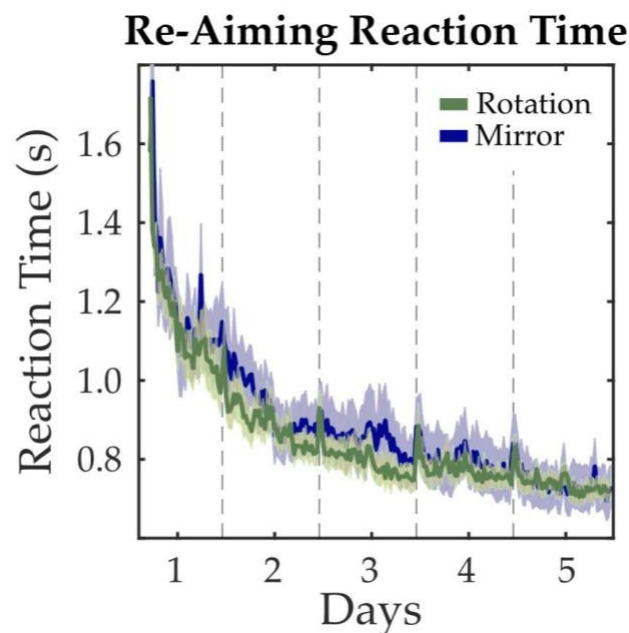

Figure 12. Reaction time across training for subjects in both Experiment Two (Rotation) and Experiment Two (Mirror-Reversal). The shaded areas represent the standard error of the mean.

Here, we find that re-aiming reaction times in both experiments gradually decrease to approximately half over the course of five days of training ( $1.4 \pm 0.2$  s in first five bins of rotation training to  $0.7 \pm 0.07$  s in last five bins of rotation training, Figure 12). While we would like to interpret this result as indicative of a proceduralization of a re-aiming strategy in both tasks, the reaction times are still quite long compared to what might be expected under no perturbation; reaction time was  $0.2 \pm 0.02$  s in the baseline phase. However, it is important to note that a direct

comparison of reaction times in baseline and during perturbation training may be misleading given the comparative brevity of the baseline (80 trials without rotation), and the added requirement of reporting intended aiming location during perturbation training. Direct comparison with previous reports of reaction time during training is also problematic given the differences in task demands (i.e., reporting of re-aiming strategies). In these previous reports, reaction times less than approximately 300-400 ms resulted in lowered performance on a visuomotor rotation task (Fernandez-Ruiz, Wong, et al. 2011; Haith, Huberdeau, and Krakauer 2015), which is approximately half of our measured reaction times by the end of training on day five. Nonetheless, the fact that we observe a significant drop in reaction times over the course of training and given the traditional view of interpreting reaction times as reflective of computational demands, we suspect that this is an indication that some degree of proceduralization has occurred.

This leaves open the question of what might underlie this proceduralization. One possibility is that the process is as simple as forming a stimulus-response mapping, allowing subjects to automatically perform an action that was previously conducted through computation (Daw, Niv, and Dayan, 2005). Additionally, stimulus-response mappings may result in a cached response or habit, which could simulate an implicit process by being extremely fast and relatively robust to added cognitive loads (Daw, Niv, and Dayan, 2005; Dayan, 2009; Haith and Krakauer, 2013). McDougale and Taylor (2019) found evidence that initial rotation re-aiming strategies eventually give-way to a theorized look-up table for each target location (a stimulus-response map). Stimulus-response relationships potentially explain previous assumptions that adaptive learning is necessarily implicit; pushing back on the idea that computations cannot be accomplished sufficiently quickly to allow learning in a forced reaction time experiment (Haith and Krakauer, 2013; Haith, Huberdeau, and Krakauer, 2015; Haith, Pakpoor, and Krakauer, 2016).

Another possibility to account for the decline in reaction time is Logan's (1988) dual process theory. Unlike the formation of a stimulus-response mapping, dual process theory explicitly imposes a second process that is engaged at each instance of reaching to a target. This process competes with the strategy until it produces better reaction times, then the proceduralization takes over. As with a stimulus-response mapping, the correct response would be specific to individual targets and generalization is not expected. It is worth noting that a single-session rotation learning experiment found no evidence supporting a dual-process account (Provost et al, 2013).

Regardless of the specific mechanistic explanation, we hold that classic implicit adaptation is not the driving force behind motor learning, but that another implicit system is largely responsible. The failure of adaptation is underscored by the mirror reversal task. At first glance, the two tasks don't appear radically different. One might expect implicit adaptation to be able to solve both. However, there are significant differences in the underlying computational demands, which the implicit adaptation system is unable to rectify. We highlight these differences with the models shown in Figures 7 and 8. Additionally, these differences could be thought of as a reparameterization, as previously considered in rotations, compared with learning a completely new structure, suggested for the mirror reversal (Braun, Aertsen, and Wolpert, 2009). The reparameterization of the transformation matrix, as seen in adaptation to a rotation, might be the fundamental function of implicit adaptation. Indeed, implicit adaptation may be exceptional at matrix reparameterization. We acknowledge that we don't know why implicit adaptation is limited in reparameterization for large rotational changes, however this is an interesting avenue for future research.

In contrast, learning a mirror reversal requires learning the full structure of the task, including the relationship between parameters in the transformation matrix. It appears that implicit adaptation tries to reparametrize the transformation matrix as if it were a rotation even if doing so is inappropriate for the task. Only after days of training does implicit adaptation appear to stop reparametrizing inappropriately. It could be that once a new structure is specified, implicit adaptation becomes appropriate for this new structure. For example, changing the gain on the mirror reversal (e.g. a 2x multiplier on the hand position in x) would show implicit aftereffects along the correct structure for a mirror. Learning this new structure, and suppressing unhelpful adaptation processes, might be what we think of as skill learning.

In light of these findings, implicit adaptation does not account for the majority of adaptive learning, even after allowing for many days of consolidation. We found no evidence that implicit adaptation is able to compensate for alternate task demands, as seen in a mirror reversal task. We believe that the majority of the learning is produced by explicit strategies and that the re-aiming strategies in our task are partially proceduralized through training. It is an open question to what this proceduralization process might be, and how implicit adaptation interacts with these novel compensatory structures. What is clear, however, is that the implicit adaptation process, as



evidenced by aftereffects, does not appear able to account for implicit learning even in sensorimotor adaptation tasks - let alone motor skill learning.

## **Materials and Methods**

### *Participants*

Seventeen first year graduate students, undergraduate students, and community members were recruited to participate in Experiment 1. Of the seventeen, 3 subjects were removed from the experiment due to equipment failure and 2 additional subjects dropped-out of the experiment without completing all five days. The remaining twelve subjects [5 female, mean age  $24.04 \pm 2.11$  yrs.] successfully completed the full experiment and their data is reported here. To have an equivalent number of subjects in the second experiment, fourteen subjects were recruited in the same manner as in Experiment 1. Two of these subjects retired from the experiment before completion. Data is presented for the remaining twelve subjects [8 female, mean age  $23.76 \pm SD$  3.04 yrs.].

Subjects were verified to be right handed by the Edinburgh Handedness Inventory (Oldfield, 1971) and self-reported having normal or corrected-to-normal vision. The experimental protocol was approved by the Princeton University Institutional Review Board and all subjects provided written, informed consent. All subjects received monetary compensation for their participation.

### *Apparatus*

Subjects performed horizontal movements in a center-out reaching task similar to that first described in Bond and Taylor (2017). Stimuli were displayed on a 60 Hz, 17-in., Planar touch sensitive monitor (Planar Systems, Hillsboro, Oregon) and computed by a Dell OptiPlex 7040 machine (Dell, Round Rock, Texas) running Windows 7 (Microsoft Co., Redmond, Washington). Movements were recorded with a Wacom magnetic digitizing pen and tablet (Wacom Co., Kazo, Japan). Aiming locations were recorded by tapping the touch sensitive monitor, which was placed 25 cm above the Wacom tablet and obscured visual access to the right hand. The game was controlled by custom software coded in MATLAB (The MathWorks, Natick, Massachusetts), using Psychtoolbox extensions (Brainard, 1997, Kleiner, Brainard, and Pelli, 2007).



## *Procedure*

Each trial began with subjects holding their right hand in the center of the workspace for 500 ms. Then, a circular orange target (0.25 cm radius) appeared 7 cm from the start position on a blue, 7 cm radius “aiming ring”. To begin the trial, subjects indicated their intended reach direction by tapping on the aiming ring with their left hand. Once an aim was recorded, the target turned from orange to green, the aiming ring disappeared, and subjects were able to begin their reach with the right hand. A small circular cursor (0.15-cm radius) provided online feedback information to subjects throughout their movement. If a subject attempted to begin moving their right hand before an aim location was registered, the message “Remember to report aim” was displayed and the trial restarted. After a successful movement beyond 7 cm, participants were guided back to the start position by a white ring. The ring was centered on the start position and its radius represented the distance of the subjects’ hand to the start position. The next trial began once the subject reached the starting position.

While reaching, subjects were instructed to move as quickly as possible past their intended aim location and back to the center in one smooth movement. This “out-and-back” motion was encouraged in order to decrease the time necessary to return to the center of the workspace. This greatly increased the number of trials that could be completed in each one-hour session. Once the right hand moved out past 7 cm, endpoint feedback was displayed for 500 ms. If the position of the cursor completely overlapped with the target ( $< 1$  deg. of angular deviation), the subject heard a pleasant “ding”. Otherwise, an unpleasant “buzz” sounded. The feedback “Too Slow” was given if the reach time from start to 7 cm exceeded 800 ms ( $< 1\%$  of trials, these trials were excluded from further analysis).

A familiarization period of 16 trials with online feedback began the experiment. Two baseline periods followed the familiarization. The first baseline period was composed of 80 trials without feedback to determine if any subject held strong biomechanical biases that would not be averaged out by the large target set. The second baseline period provided veridical feedback, was also 80 trials long, and was designed to wash-out any drift that may have developed in the no-feedback phase. Subjects were not asked to report their aim during these baseline trials as it was assumed that they would always be aiming at the target. A pause was included after the baseline trials so that the experimenter could explain the aiming procedure to the subjects. Following these instructions, subjects completed 16 trials with veridical feedback to familiarize themselves with

the touch screen and aiming procedure. The first day concluded with 608 perturbation trials with a three-minute break at the midpoint.

On days two through five, the perturbation was present from the first trial. Subjects were given a quick refresher of the aiming and movement instructions at the beginning of each day and were told that they would “pick up right where they left off” the day before. Subjects completed 800 trials each day, with an approximately 3-minute break halfway through. A total of 3,808 training trials were completed. At the end of day five, a 32-trial washout period was completed without feedback. During this washout, subjects were instructed to discontinue any strategy they had developed and aim straight for the target.

In Experiment 1, the perturbation was a  $45^\circ$  rotation in either the clockwise or counterclockwise direction (counterbalanced between subjects). In Experiment 2, the perturbation was a mirror about the vertical midline. In order to allow comparison between the two experiments, the four targets in Experiment 2 were located  $22.5^\circ$  from the midline so that the solution to the perturbed reach was a  $45^\circ$  angle. The 12 targets in Experiment 1 were evenly spaced  $22.5^\circ$  apart on the aiming ring. Both experiments were programmed such that each of the targets appeared before any was again repeated.

### *Data and statistical analyses*

The experiment presentation, data collection, and statistical analysis were all completed in Matlab (The Mathworks, 2016b). During both experiments, the digitizing tablet logged the trajectory of the right hand and the touchscreen monitor recorded the position tapped to indicate aiming location. The trajectories were transformed into heading angles for the hand by examining the average angle of the hand from a straight-line path to the target between 1 and 3 cm into movement. An aiming angle for each trial was defined by the angle between the target and the location tapped on the touchscreen. Implicit adaptation was calculated as the subtraction of the aim angle from the hand heading angle in each trial (Taylor, Krakauer, and Ivry, 2014). In all measures, a positive angle represents a counterclockwise divergence from the target. As we measured only two values, and computed implicit adaptation from those values, we conducted statistical analyses for only the aiming angles and implicit adaptation angles (Hutter and Taylor, 2018). We report the mean and standard deviation of hand angles for completeness only. Reaction times were calculated as the interval from target appearance to aim-report, except where noted.

## *Modeling and computational analyses*

To predict the time courses of explicit and implicit processes in the mirror task, we used a modified version of the two-state model (Smith et al., 2006). Here, we modeled explicit re-aiming as the fast process ( $X_f$ ) and implicit adaptation as the slow process ( $X_s$ ) over the course of 200 trials (McDougle, Bond, and Taylor 2015). In addition, we assumed that the explicit re-aiming is updated based on target error, while implicit adaptation is updated based on the aim-to-cursor distance (McDougle, Bond, and Taylor, 2015; Equations 1 and 2).

$$\textcircled{1} X_f(n+1) = \alpha_f \times X_f(n) + \beta_f \times E_f(n)$$

$$\textcircled{2} X_s(n+1) = \alpha_s \times X_s(n) + \beta_s \times E_s(n)$$

Where  $E_f$  is the error between the target and the cursor locations, while  $E_s$  is the error between explicit re-aiming ( $X_f$ )( $n$ ) and the cursor location. Note, we did not input actual values of explicit re-aiming in these simulations but instead simply treated them as a faster learning process. In addition, we did not fully collapse the target locations to a common axis in order to demonstrate how the mirror-reversal perturbation causes different signed errors depending on target location. As such, we separately simulated target locations in the first and third quadrants, and second and fourth quadrants. The values on  $\alpha_f, \beta_f, \alpha_s$ , and  $\beta_s$  were determined by hand tuning these parameters to the simple rotation case (Rotation-Task-Rotation-Correction Model, Figures 7B and 8B ;  $\alpha_f = 1, \beta_f = 0.2, \alpha_s = 0.98$ , and  $\beta_s = 0.01$ ). Note, we chose a value for  $\alpha_s$  that was slightly lower than one to simulate an asymptotic value of implicit adaptation that is similar to what has been observed experimentally. These same parameter values were then used for both the Mirror-Task-Rotation-Correction and the Mirror-Task-Mirror-Correction Model. In the Mirror-Task-Rotation-Correction Model, the error for implicit adaptation was defined in exactly the same way as in the Rotation-Task-Rotation-Correction Model.

To demonstrate the effect of implicit adaptation switching the error-correction calculation to be consistent with the mirror reversal, we flipped the sign of the implicit error term in the Mirror-Task-Mirror-Correction Model (Equation 3).

$$\textcircled{3} X_s(n+1) = \alpha_s \times X_s(n) - \beta_s \times E_s(n)$$

## References

- Baddeley, R. J., Ingram, H. A., & Miall, R. C. (2003). System identification applied to a visuomotor task: near-optimal human performance in a noisy changing task. *Journal of Neuroscience*, 23(7), 3066-3075.
- Benson, B. L., Anguera, J. A., & Seidler, R. D. (2011). A spatial explicit strategy reduces error but interferes with sensorimotor adaptation. *Journal of neurophysiology*, 105(6), 2843-2851.
- Bond, K. M., & Taylor, J. A. (2015). Flexible explicit but rigid implicit learning in a visuomotor adaptation task. *Journal of neurophysiology*, 113(10), 3836-3849.
- Bond, K.M. and Taylor, J.A. (2017). Structural learning in a visuomotor adaptation task is explicitly accessible. *eNeuro*, 4(4)
- Brainard, D. H., & Vision, S. (1997). The psychophysics toolbox. *Spatial vision*, 10, 433-436.
- Brashers-Krug, T., Shadmehr, R., & Bizzi, E. (1996). Consolidation in human motor memory. *Nature*, 382(6588), 252.
- Butcher, P.A. and Taylor J.A. (2018). Decomposition of a sensory-prediction error signal for visuomotor adaptation. *Journal of Experimental Psychology: Human Perception and Performance*, 44(2):175-194.
- Castro, L. N. G., Hadjiosif, A. M., Hemphill, M. A., & Smith, M. A. (2014). Environmental consistency determines the rate of motor adaptation. *Current Biology*, 24(10), 1050-1061.
- Cohen, J. D., Dunbar, K., & McClelland, J. L. (1990). On the control of automatic processes: a parallel distributed processing account of the Stroop effect. *Psychological review*, 97(3), 332.
- Corkin, S. (1968). Acquisition of motor skill after bilateral medial temporal-lobe excision. *Neuropsychologia*, 6(3), 255-265.
- Criscimagna-Hemminger, S. E., & Shadmehr, R. (2008). Consolidation patterns of human motor memory. *Journal of Neuroscience*, 28(39), 9610-9618.
- Cunningham, H. A. (1989). Aiming error under transformed spatial mappings suggests a structure for visual-motor maps. *Journal of experimental psychology: Human perception and performance*, 15(3), 493.
- Daw, N. D., Niv, Y., & Dayan, P. (2005). Uncertainty-based competition between prefrontal and dorsolateral striatal systems for behavioral control. *Nature neuroscience*, 8(12), 1704.
- Day, K. A., Roemmich, R. T., Taylor, J. A., & Bastian, A. J. (2016). Visuomotor learning generalizes around the intended movement. *eNeuro*, 3(2).
- Dayan, P. (2009). Dopamine, reinforcement learning, and addiction. *Pharmacopsychiatry*, 42(S 01), S56-S65.
- Fernandez-Ruiz, J., Wong, W., Armstrong, I. T., & Flanagan, J. R. (2011). Relation between reaction time and reach errors during visuomotor adaptation. *Behavioural brain research*, 219(1), 8-14.
- Fine, M. S., & Thoroughman, K. A. (2006). Motor adaptation to single force pulses: sensitive to direction but insensitive to within-movement pulse placement and magnitude. *Journal of neurophysiology*, 96(2), 710-720.

- Fine, M. S., & Thoroughman, K. A. (2007). Trial-by-trial transformation of error into sensorimotor adaptation changes with environmental dynamics. *Journal of neurophysiology*, 98(3), 1392-1404.
- Haith, A. M., & Krakauer, J. W. (2013). Model-based and model-free mechanisms of human motor learning. In *Progress in motor control* (pp. 1-21). Springer, New York, NY.
- Haith, A. M., Huberdeau, D. M., & Krakauer, J. W. (2015). The influence of movement preparation time on the expression of visuomotor learning and savings. *Journal of neuroscience*, 35(13), 5109-5117.
- Hegele, M., & Heuer, H. (2010). Implicit and explicit components of dual adaptation to visuomotor rotations. *Consciousness and cognition*, 19(4), 906-917.
- Held, R., & Schrank, M. (1959). Adaptation to disarranged eye-hand coördination in the distance-dimension. *The American journal of psychology*, 603-605.
- Helmholtz, H. L. F. (1867). *Handbuch der Physiologischen Optik* (published as "Helmholtz's treatise on physiological optics, Translated from the Third German Edition," ed. James PC Southall; 1925). Washington, DC: The Optical Society of America.
- Herzfeld, D. J., Vaswani, P. A., Marko, M. K., & Shadmehr, R. (2014). A memory of errors in sensorimotor learning. *Science*, 345(6202), 1349-1353.
- Heuer, H., & Hegele, M. (2008). Adaptation to visuomotor rotations in younger and older adults. *Psychology and aging*, 23(1), 190.
- Hollerbach, J. M., & Atkeson, C. G. (1987). Deducing planning variables from experimental arm trajectories: Pitfalls and possibilities. *Biological Cybernetics*, 56(5-6), 279-292.
- Howard, I. S., Ingram, J. N., Franklin, D. W., & Wolpert, D. M. (2012). Gone in 0.6 seconds: the encoding of motor memories depends on recent sensorimotor states. *Journal of Neuroscience*, 32(37), 12756-12768.
- Huberdeau, D. M., Krakauer, J. W., & Haith, A. M. (2017). Practice induces a qualitative change in the memory representation for visuomotor learning. *BioRxiv*, 226415.
- Hutter, S. A., & Taylor, J. A. (2018). Relative sensitivity of explicit re-aiming and implicit motor adaptation. *Journal of neurophysiology*. 120(5): 2640-2648.
- Imamizu, H., Uno, Y., & Kawato, M. (1995). Internal representations of the motor apparatus: implications from generalization in visuomotor learning. *Journal of Experimental Psychology: Human Perception and Performance*, 21(5), 1174.
- Jordan, M. I., & Rumelhart, D. E. (1992). Forward models: Supervised learning with a distal teacher. *Cognitive science*, 16(3), 307-354.
- Kim, H. E., Morehead, J. R., Parvin, D. E., Moazzezi, R., & Ivry, R. B. (2018). Invariant errors reveal limitations in motor correction rather than constraints on error sensitivity. *Communications Biology*, 1(1), 19.
- Kim, H. E., Parvin, D. E., & Ivry, R. B. (2019). The influence of task outcome on implicit motor learning. *eLife*, 8, e39882.

- Kleiner, M., Brainard, D., Pelli, D., Ingling, A., Murray, R., & Broussard, C. (2007). What's new in Psychtoolbox-3. *Perception*, 36(14), 1.
- Kohler, I. (1941). *Der Einfluß der Erfahrung in der optischen Wahrnehmung. Beleuchtet von Versuchen langdauernden Tragens bildverzerrender Prismen. Phil* (Doctoral dissertation, Dissertation, Innsbruck).
- Kohler, I. (1951a). *U"ber Aufbau und Wandlungen der Wahrnehmungswelt. Insbesondere u"ber 'bedingte Empfindungen'. Wien: Rohrer: Osterreichische Akademie der € Wissenschaften, Philosophisch-historische Klasse. Sitzungsberichte* 227.
- Kohler, I. (1951b). *Warum sehen wir aufrecht - obwohl die Bilder im Inneren des Auges verkehrt stehen? Die Pyramide*, 28e33.
- Krakauer, J. W. (2009). Motor learning and consolidation: the case of visuomotor rotation. In *Progress in motor control* (pp. 405-421). Springer, Boston, MA.
- Krakauer, J. W., & Shadmehr, R. (2006). Consolidation of motor memory. *Trends in neurosciences*, 29(1), 58-64.
- Logan, G. D. (1980). Attention and automaticity in Stroop and priming tasks: Theory and data. *Cognitive psychology*, 12(4), 523-553.
- Logan, G. D. (1988). Toward an instance theory of automatization. *Psychological review*, 95(4), 492.
- Mazzoni, P., & Krakauer, J. W. (2006). An implicit plan overrides an explicit strategy during visuomotor adaptation. *Journal of neuroscience*, 26(14), 3642-3645.
- McDougle, S. D., & Taylor, J. A. (2019). Dissociable cognitive strategies for sensorimotor learning. *Nature communications*, 10(1), 40.
- McDougle, S. D., Bond, K. M., & Taylor, J. A. (2017). Implications of plan-based generalization in sensorimotor adaptation. *Journal of neurophysiology*, 118(1), 383-393.
- Morehead, J. R., Taylor, J. A., Parvin, D. E., & Ivry, R. B. (2017). Characteristics of implicit sensorimotor adaptation revealed by task-irrelevant clamped feedback. *Journal of cognitive neuroscience*, 29(6), 1061-1074.
- Morehead, J.R., Smith, M. (2017, November). The magnitude of implicit sensorimotor adaptation is limited by continuous forgetting. Abstract. Advances in Motor Learning & Motor Control, Washington DC.
- Oldfield, R. C. (1971). The assessment and analysis of handedness: the Edinburgh inventory. *Neuropsychologia*, 9(1), 97-113.
- Pine, Z. M., & Krakauer, J. W. (1996). Learning of scaling. *Neuroreport*, 7, 2357-2361.
- Provost, A., Johnson, B., Karayanidis, F., Brown, S. D., & Heathcote, A. (2013). Two routes to expertise in mental rotation. *Cognitive science*, 37(7), 1321-1342.
- Redding, G. M., & Wallace, B. (1996). Adaptive spatial alignment and strategic perceptual-motor control. *Journal of Experimental Psychology: Human Perception and Performance*, 22(2), 379.

- Sachse, P., Beermann, U., Martini, M., Maran, T., Domeier, M., & Furtner, M. R. (2017). “The world is upside down”–The Innsbruck goggle experiments of Theodor Eriemann (1883–1961) and Ivo Kohler (1915–1985). *Cortex*, 92, 222-232.
- Saijo, N., & Gomi, H. (2010). Multiple motor learning strategies in visuomotor rotation. *PLoS One*, 5(2), e9399.
- Scheidt, R. A., Dingwell, J. B., & Mussa-Ivaldi, F. A. (2001). Learning to move amid uncertainty. *Journal of neurophysiology*, 86(2), 971-985.
- Schween, R., McDougle, S. D., Hegele, M., & Taylor, J. A. (2019). Explicit strategies in force field adaptation. *BioRxiv*, 694430.
- Semrau, J. A., Daitch, A. L., & Thoroughman, K. A. (2012). Environmental experience within and across testing days determines the strength of human visuomotor adaptation. *Experimental brain research*, 216(3), 409-418.
- Shadmehr, R., & Brashers-Krug, T. (1997). Functional stages in the formation of human long-term motor memory. *Journal of Neuroscience*, 17(1), 409-419.
- Smith, M. A., Ghazizadeh, A., & Shadmehr, R. (2006). Interacting adaptive processes with different timescales underlie short-term motor learning. *PLoS biology*, 4(6), e179.
- Stratton, G. M. (1896). Some preliminary experiments on vision without inversion of the retinal image. *Psychological review*, 3(6), 611.
- Stratton, G. M. (1897). Vision without inversion of the retinal image. *Psychological review*, 4(4), 341.
- Taylor, J. A., Krakauer, J. W., & Ivry, R. B. (2014). Explicit and implicit contributions to learning in a sensorimotor adaptation task. *Journal of Neuroscience*, 34(8), 3023-3032.
- Taylor, J.A. and Ivry, R.B., (2011). Flexible strategies during motor learning. *PLoS Computational Biology*, 7(3)
- Telgen, S., Parvin, D., & Diedrichsen, J. (2014). Mirror reversal and visual rotation are learned and consolidated via separate mechanisms: recalibrating or learning de novo?. *Journal of Neuroscience*, 34(41), 13768-13779.
- Wei, K., & Kording, K. (2009). Relevance of error: what drives motor adaptation?. *Journal of neurophysiology*, 101(2), 655-664.
